# Supplementary material
Source: Springer Nature journal article supplement (https://www.springermedizin.de/resource/supplementary/12874_2011_651_MOESM1_ESM.pdf/9432320)

Classification of subjects into group using  
cluster analysis (CA)

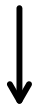

Estimate intraclass correlation (ICC) for  
each item based on subjects classified  
into groups by CA

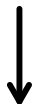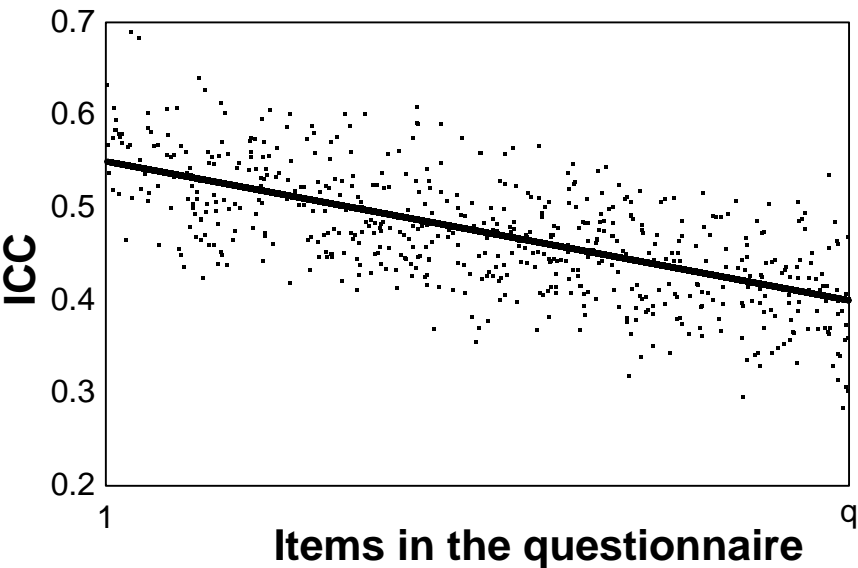

Supplement: MOESM1 [file 9432320]
